# Supplementary material for: Autopsy and statistical evidence of disturbed hemostasis progress in COVID-19: medical records from 407 patients
Source: Thromb J. 2021 Feb 10;19:8. doi: 10.1186/s12959-020-00256-5 (PMC7873516; doi:10.1186/s12959-020-00256-5)
Supplement: Supplementary file 2 — Additional file 2: Table S2. Demographic and clinical features between survivors and nonsurvivors of 81 critically ill patients with COVID-19. [file 12959_2020_256_MOESM2_ESM.xlsx]

## Sheet: Sheet1
Table S2. Demographic and clinical features between survivors and non-survivors of 81 critically ill patients with COVID-19
Characteristics		Critical patients (n=81)
		survivor (n=42)	Non-survivor (n=39)	P value
Age - Median (IQR) - years		63.5 (56.0-70.0)	68.0 (60.5-73.5)
Distribution - no. (%)
	＜40	2 (4.8)	1 (2.6)	0.0913
	40-65	24 (57.1)	15 (38.5)
	＞65	16 (38.1)	23 (59.0)
	Range	26-92	24-90
Gender - no. (%)
	Female	20 (47.6)	12 (30.8)	0.12
	Male	22 (52.4)	27 (69.2)
Major Comorbidities – no. (%)		26 (61.9)	13 (33.3)	0.01
	Coronary artery disease	7 (16.7)	5 (12.8)	0.62
	Hypertension	23 (54.8)	8 (20.5)	0.002
	Diabetes mellitus	12 (28.6)	3 (7.7)	0.02
Hospital stay - Median (IQR) - days		35.0 (21.3-40.5)	10.0 (6.5-16.5)	<0.0001
The denominators included in the analysis are provided if they differ from the overall numbers in the group. Reduced denominators indicate missing data.
P values indicate the difference between survivors and non-survivors, and P value less than 0.05 was considered significantly difference.
