# Supplementary material for: Autopsy and statistical evidence of disturbed hemostasis progress in COVID-19: medical records from 407 patients
Source: Thromb J. 2021 Feb 10;19:8. doi: 10.1186/s12959-020-00256-5 (PMC7873516; doi:10.1186/s12959-020-00256-5)
Supplement: Supplementary file 6 — Additional file 6: Table S6. Median, interquartile and statistical test results across different hospitalization days between survivors and nonsurvivors on different days before outcome related to Fig. 3. [file 12959_2020_256_MOESM6_ESM.xlsx]

## Sheet: critical
Day.after.admission	PLT(x10^9/L)				GLU(mmol/L)				TC(mmol/L)				TG(mmol/L)				HDL(mmol/L)				LDL(mmol/L)				PT(s)				APTT(s)				TT(s)				FIB(g/L)				D.dimer(g/L)				DIC
	Median	Q3	Q1	no.	Median	Q3	Q1	no.	Median	Q3	Q1	no.	Median	Q3	Q1	no.	Median	Q3	Q1	no.	Median	Q3	Q1	no.	Median	Q3	Q1	no.	Median	Q3	Q1	no.	Median	Q3	Q1	no.	Median	Q3	Q1	no.	Median	Q3	Q1	no.	Median	Q3	Q1	no.
1	142	217	46	83	10.66	14.16	6.9125	60	3.085	3.77	2.1525	76	1.53	2.815	0.915	35	0.64	0.77	0.315	31	1.55	2.05	0.805	31	17.1	19.725	14.85	56	45.45	56	40.05	56	15.85	17.725	14.6	56	3.985	5.1	3.1475	56	2.74	19.785	1.4475	56	5	6	4	55
2	100	180	42	49	10.54	14.08	8.005	43	2.615	3.225	2.0525	46	1.73	3.135	0.9	19	0.5	0.7	0.32	19	1.4	1.85	0.91	19	16.9	19.6	15.75	44	49.95	62.65	42.6	44	16.7	19.625	15.175	44	4.315	5.34	2.7325	44	4.59	16.505	2.575	43	6	6	5	43
3	123.5	178.5	65.5	52	9.32	12.5	6.81	41	2.735	3.6	2.23	46	2.1	3.275	1.665	20	0.59	0.685	0.41	20	1.715	2.135	1.0375	20	16.6	18.8	15.45	47	48.4	58.85	41.25	47	17.9	20.55	15.9	47	3.92	5.095	2.7	47	3.88	11.03	1.615	47	5	6	4	47
4	105	177.75	69.75	48	8.87	10.88	7.0625	40	2.9	3.54	2.19	47	1.705	2.61	1.1	20	0.58	0.715	0.35	20	1.355	2.0825	1.1075	20	16.2	18.1	15.2	41	51.05	55.9	42.125	40	15.65	19.8	14.975	40	3.82	4.8225	2.955	40	3.77	9.925	1.595	42	5	6	4	39
5	102	177	61	39	10.265	11.52	7.725	28	2.945	3.7	2.1925	34	1.77	2.715	1.455	15	0.39	0.56	0.275	15	1.39	1.99	0.825	15	15.8	17.3	14.775	32	49.6	58.075	40.55	32	15.9	17.45	14.5	32	4.045	4.9825	3.33	32	2.63	3.93	2.0475	30	4.5	5.75	4	30
6	104	169	68	41	10.12	11.51	6.61	33	2.795	3.615	2.4525	36	2.19	3.3	1.06	17	0.475	0.7975	0.375	16	1.59	2.3425	1.195	16	15.25	16.725	14.575	36	47.8	56.925	41.675	36	15.85	18.4	15.3	36	4.1	4.6875	3.465	36	2.26	4.43	1.61	33	4	5	4	33
7	118.5	198.75	73.75	46	8.16	11.39	6.34	37	3.06	4.04	2.48	42	1.84	2.685	1.665	14	0.47	0.87	0.39	13	1.51	2.6	1.06	13	15.55	16.95	14.55	34	43.9	53.875	40.425	34	16.2	18.55	14.7	34	4.135	4.8475	3.27	34	2.2	4.105	1.6	35	4	5	4	34
8	135.5	222	89	38	8.105	11.895	6.2325	30	3.27	3.65	2.795	35	1.48	2.155	1.04	19	0.575	0.7625	0.4725	16	2.115	2.5425	1.455	16	15.9	17.3	14.4	35	48.9	54.05	42.6	35	16.1	18.3	14.75	35	4.08	5.435	3.295	35	2.21	3.78	1.83	35	4	5	4	35
9	154	215.5	93.5	35	8.64	11.465	6.5075	26	2.99	3.585	2.47	31	1.54	1.9475	1.025	12	0.545	0.735	0.445	12	1.875	2.12	1.315	12	16.2	17.15	15.1	31	46.8	54.05	41.25	31	16.6	18.3	14.75	31	4.15	5.11	3.16	31	2.8	9.42	1.8	31	5	5	4	31
10	137	233	95.5	35	9.34	11.605	7.72	23	3.025	3.84	2.4575	26	1.8	1.85	1.47	9	0.77	0.93	0.6125	8	1.61	2.085	1.305	8	15.6	17.15	14.85	31	44.7	51.7	37.85	31	16.3	17.35	15.15	31	4.5	5.945	3.255	31	2.37	9.245	1.355	31	4	5	4	31
11	185	274.5	137	27	7.965	11.63	6.8775	24	2.91	3.56	2.43	29	1.135	2.09	0.795	12	0.66	0.805	0.52	11	1.73	2.815	1.47	11	16.5	17.4	14.9	21	42.2	49.6	39.8	21	15.9	19.6	14.8	21	3.91	4.91	2.78	21	2.48	6.04	1.48	21	4	5	4	21
12	171	230	127	31	9.19	11.4275	6.0475	26	3.035	3.52	2.695	30	1.38	1.555	1.035	11	0.755	0.84	0.6525	10	1.87	2.225	1.8375	10	15.6	17.225	14.6	24	47.2	48.15	36.65	23	16.4	17.85	15.15	23	4.13	5.165	2.815	23	2.55	3.505	1.9175	24	4	5	4	23
13	197	235	132	33	7.78	10.94	5.83	25	3.47	4.33	2.58	29	1.345	1.705	0.9325	14	0.755	0.825	0.5725	12	1.575	2.07	1.3875	12	15	15.8	14	23	43.8	46.65	40.8	23	15.3	15.85	14.65	23	4.73	5.53	3.435	23	2.1	2.8875	1.6125	22	4	5	4	22
14	192.5	258	151.75	28	10.29	12.57	6.48	20	3.08	3.98	2.1875	24	1.34	1.71	1.17	13	0.7	0.8025	0.465	12	2.055	2.7	1.3975	12	15.1	16.1	14.2	25	42.7	46.8	38.4	25	15.5	17.9	14.5	25	4.12	5.15	3.07	25	2.55	4.04	1.68	25	4	5	4	25
15	156	208.5	127.5	23	9.8	10.6975	7.79	18	3.24	4.0725	2.545	22	1.16	1.615	0.985	11	0.51	0.735	0.41	11	1.79	2.375	1.27	11	15.55	17.05	14.575	18	44.55	50.525	42.375	18	15.95	18.375	14.85	18	3.905	4.9675	2.8125	18	2.565	4.6275	2.1825	18	4	5	4	18
16	182.5	256.5	139.25	30	7.925	11.665	6.2175	22	3.44	4.06	2.875	27	1.585	2.47	0.7625	10	0.6	0.77	0.58	7	2.42	2.83	1.55	7	14.8	15.75	14	28	43.1	49.3	36.7	28	16.2	18.3	15.55	28	4.16	5.3825	2.8875	28	2.415	3.1625	1.5225	28	4	5	4	27
17	203	300	125	25	8.155	10.39	6.12	16	3.81	4.365	2.735	23	1.39	2.045	1.355	7	0.66	0.975	0.53	7	2.59	2.895	2.205	7	15.1	16.5	14.3	21	43.7	50.2	41.1	21	16.3	18.3	15.4	21	3.33	4.22	2.97	21	2.87	4.46	2.26	21	4	5	4	21
18	206	296	131	25	8.39	9.92	6.39	15	3.345	3.89	2.82	22	1.435	1.85	0.9775	10	0.555	0.6925	0.495	8	2.335	2.525	1.735	8	15.25	15.85	14.35	22	41.25	45.8	38.15	22	15.6	17.05	14.725	22	3.935	5.135	3.175	22	2.925	5.7725	2.305	22	4.5	5	4	22
19	205	290	134	25	7.85	8.5	6.85	17	3.35	4.29	2.785	22	1.815	2.4275	1.455	12	0.635	0.8275	0.4925	12	2.32	2.7875	1.68	12	14.75	16.225	14.075	20	41.75	46.525	37.125	20	15.45	16.65	14.875	20	3.745	5.15	3.0825	20	2.985	5.1775	1.5875	20	5	5	4	20
20	234	313	136	23	7.02	8.545	5.63	19	3.425	4.135	2.785	22	1.49	2.06	1.4	9	0.665	0.9825	0.5125	8	2.14	2.715	1.8525	8	14.9	15.65	14	20	43.65	48.825	36.525	20	15.7	16.675	15.125	20	3.805	4.3525	2.525	20	2.68	4.5	1.865	19	5	5	4	19
21	203	291.5	143	23	8.71	10.625	5.805	19	3.44	4.52	2.935	23	1.39	2.245	0.98	8	0.72	1.18	0.65	5	1.98	2.1	1.92	5	15.15	15.8	14.725	18	41.3	46.85	36.8	18	15.55	16.85	14.525	18	3.655	4.8375	3.045	18	2.39	4.64	1.545	19	4	5	4	18
22	196	238	155	24	7.86	9.83	6.5	17	3.425	3.87	2.7725	24	1.21	2.115	1.05	11	0.555	0.8175	0.505	10	2.425	2.52	2.1925	10	14.85	15.2	14.125	18	40.9	45.5	36.675	18	15.6	16.175	14.875	18	3.88	4.66	3.5375	18	2.2	5.04	1.18	17	5	5	4	17
23	187	287.25	164.25	20	7.42	9.205	5.8	11	3.305	4.1	2.815	20	1.57	2.04	0.99	9	0.6	0.61	0.52	9	2.12	2.75	2.07	9	14.6	15.4	14.2	17	40	46.4	38.7	17	15.8	16.5	15.1	17	4.31	5.76	3.67	17	2.72	3.9275	1.66	18	4	5	4	17
24	182	278	152.5	23	8.78	10.26	6.725	19	3.28	4.27	2.72	24	1.5	2.12	1.14	13	0.52	0.6	0.445	11	1.79	2.445	1.7	11	14.8	16	13.8	19	41.2	44.8	31.3	19	15.4	15.8	14.75	19	4.25	5.51	2.98	19	4.1	6.73	1.815	20	5	5	4	19
25	156	289	104	17	7.27	10.33	5.915	12	3.35	3.61	2.76	17	1.37	1.48	1.19	5	0.59	0.68	0.575	3	2.16	2.85	1.905	3	15.2	15.85	14.675	14	42.4	44.6	38.5	13	15.1	16.2	14.8	13	4.27	5.06	3	13	4.21	5.73	1.25	15	5	5	5	13
26	223	284	176.5	19	8.53	10.6	6.59	17	3.665	4.1175	3.035	20	2.16	2.5675	1.8175	4	0.88	1.11	0.81	4	2.97	3.6325	2.115	4	14.45	15.05	13.65	18	37.2	41.55	34.05	18	15.9	16.775	15.025	18	4.355	5.52	3.68	18	2.69	5.81	1.3875	18	4	5	4	18
27	209.5	362.75	143.5	16	9.44	9.93	7.085	11	3.455	4.7975	2.8325	14	2.21	2.84	1.88	3	0.67	0.78	0.665	3	2.93	3.085	2.825	3	15	15.35	13.4	12	41.8	42.7	37.5	12	15.35	16.05	14.375	12	4.535	5.835	3.8	12	2.31	7.025	1.335	12	4	5	4	12
28	195	288.5	149.75	18	8.315	11.205	6.6175	14	3.15	4.19	2.7	17	1.375	1.7825	0.93	10	0.78	1.2925	0.6925	10	1.89	2.5375	1.7325	10	15.2	15.975	14.25	18	38.75	43.075	35.65	18	16.1	17.675	15.075	18	3.715	4.4725	3.0875	18	2.65	6.0525	2.0025	18	4	5	4	18
29	176	272	140	17	8.17	12.165	7.02	11	2.95	4.05	2.415	15	1.16	1.32	0.76	5	0.65	0.83	0.545	4	2.215	3.2175	1.39	4	15.6	16.55	14.35	15	38.1	45.8	33.45	15	16.5	16.8	15.35	15	3.65	4.59	2.57	15	2.35	4.195	1.715	15	4	5	4	15
30	183	243	141	19	6.8	7.19	6.31	13	3.54	3.99	2.93	17	0.94	1.38	0.625	3									15.1	15.95	14.25	15	39.6	46.7	35.65	15	16.4	17.15	16.1	15	4.25	4.59	3.65	15	2.77	4.5	1.715	15	4	5	4	15
31	173	272	130	13	9.77	11.4775	6.2675	10	3.21	4.34	2.67	13	1.89	2.685	1.585	3									15.25	15.95	14.55	12	37.9	44.3	36.25	12	16.35	17.725	15.125	12	4.585	4.9975	4.005	12	2.445	4.9725	2.0775	12	4	5	4	12
32	172	318	112	17	7.5	9.31	6.145	15	3.24	3.86	2.73	17	1.31	1.35	1.28	5	0.795	1.0525	0.63	4	3.1	4.1225	2.2725	4	15.5	16.8	14.65	15	39.2	43.5	32.9	15	16.1	16.55	15.55	15	4.43	5.09	3.295	15	3.38	10.435	1.985	15	5	5	4	15
33	172	335	87	13	8.79	10.73	7.48	11	3.63	4.8575	2.6225	12													15.55	16.875	13.55	12	44.2	45.725	34.65	12	15.7	16.9	14.85	12	4.365	4.91	4.1675	12	4.58	10.8875	2.2425	12	5	5.25	4	12
34	199	290.5	147.5	15	7.39	10.3625	6.91	14	3.75	4.3875	2.795	16	1.45	2.045	0.87	7	0.575	0.6475	0.4275	6	1.78	2.4075	1.25	6	15.35	16.875	13.75	14	43	46.65	35.175	14	16.45	16.775	14.525	14	4.975	5.9025	4.6875	14	2.67	7.895	1.9625	14	5	5	4	14
35	195	236.5	150.75	10	11.47	11.69	8.07	9	2.8	3.81	2.63	9	1.24	1.49	1.04	5	1.005	1.55	0.525	4	2.885	4.415	1.38	4	16.1	17.2	14.7	9	43.7	47.6	40.2	9	16.3	17.1	15.3	9	5.21	5.67	4.68	9	3.23	7.6	2.84	9	5	5	5	9
36	130	246	103	9	7.43	10.305	6.3225	8	3.64	6.62	3	9	1.97	2.06	1.16	5	1.135	1.6475	0.625	4	3.96	5.3525	2.35	4	15.2	16.8	13.9	9	39	43.7	37.1	9	15.9	16.2	15.1	9	4.15	5.7	3.16	9	7.08	21	2.43	9	5	5	4	9
37	273	308	143	7	5.95	9.225	5.665	7	3.74	5.08	3.33	7													14.55	15.575	14.125	6	40.85	44.275	36.9	6	16.65	17.4	15.375	6	4.965	5.2325	3.82	6	3.42	6.125	1.5475	6	4.5	5	4	6
38	160.5	198.75	127.25	8	6.71	7.895	6.115	7	3.08	3.325	2.47	7													14.6	15.8	14.45	7	35.2	35.2	32.95	6	15	16.125	14.4	6	3.355	4.1675	2.85	6	12.08	17.04	6.39	7	5	5	5	6
39	241.5	299.75	198	8	7.43	8.19	6.945	7	3.84	5.56	3.09	7	1.955	2.0475	1.5625	4	0.86	1.335	0.725	3	2.77	4.18	2.4	3	14.25	14.675	13.825	6	42.35	44.375	35.45	6	15.75	15.9	14.925	6	4.45	6.98	3.78	6	2.03	7.865	1.07	6	4	4.75	2.5	6
40	218	292.5	148	3
41	237	374	230	5	8.22	9.15	7.34	5	4.79	4.98	3.99	5	1.65	1.915	1.605	3	0.8	1.24	0.77	3	2.57	3.595	2.56	3	14.95	16.2	14.45	4	43.25	50.55	41.85	4	16.05	18.825	15.725	4	5.81	6.5475	4.53	4	2.5	4.1125	1.9725	4	4	4.25	4	4
42	216	356.75	96.25	6	5.92	9.02	5.4925	4	4.185	5.5375	3.1675	4	1.78	2.815	1.51	3	0.81	0.895	0.755	3	3.47	4.255	2.83	3	14.5	15.425	13.725	4	37.8	43.375	32.625	4	17.1	17.45	16.2	4	6.145	7.4425	4.5625	4	9.465	15.52	3.98	4	5	5	4.75	4
43	261.5	346.25	210.75	4	7.085	7.8575	6.3825	4	4.74	5.775	3.8125	4	2.055	2.76	1.55	4	0.86	1.1	0.74	4	2.845	3.425	2.5575	4	14.65	14.975	14.2	4	41.85	43.175	37.175	4	17.45	18.8	16.775	4	4.995	6.3825	3.8325	4	1.48	2.695	1.44	3	4	4.5	4	3
44	246	295	112.25	6	7.625	9.2975	5.8225	4	3.74	4.18	3.68	5	1.54	3.395	1.37	3	0.72	0.765	0.68	3	2.51	3.21	2.075	3	15.25	15.925	14.7	4	42.8	43.725	41.725	4	15.6	18.25	14.925	4	4.155	4.6625	3.6725	4	11.155	21	1.2275	4	5	6	3.5	4
45	290.5	355.5	225.75	4	7.02	9.755	6.185	3	4.54	5.035	3.96	3	3.47	3.785	2.44	3	0.78	0.8	0.765	3	2.74	3.315	2.515	3	13.8	14.55	13.35	3	33.7	38	31.65	3	17.8	18.45	15.8	3	4.11	4.26	4.04	3	1.53	10.97	1.1	3	4	4.5	3	3

## Sheet: critical.survivor
Day.after.admission	PLT(x10^9/L)				GLU(mmol/L)				TC(mmol/L)				TG(mmol/L)				HDL(mmol/L)				LDL(mmol/L)				PT(s)				APTT(s)				TT(s)				FIB(g/L)				D.dimer(g/L)				DIC
	Median	Q3	Q1	no.	Median	Q3	Q1	no.	Median	Q3	Q1	no.	Median	Q3	Q1	no.	Median	Q3	Q1	no.	Median	Q3	Q1	no.	Median	Q3	Q1	no.	Median	Q3	Q1	no.	Median	Q3	Q1	no.	Median	Q3	Q1	no.	Median	Q3	Q1	no.	Median	Q3	Q1	no.
1	200	259	139	43	6.505	10.5175	5.51	26	3.58	4.475	2.94	38	1.685	2.955	0.94	22	0.71	0.87	0.4975	18	1.77	2.165	1.0975	18	14.7	15.3	13.7	25	44.7	52.9	40.6	25	15.7	16.9	14.4	25	3.97	4.82	3.51	25	1.52	2.5725	0.895	26	4	4	3	25
2	180	216.5	109	15	10.48	12.025	8.085	11	2.66	2.8325	2.4875	12	1.345	3.2	0.815	4	0.51	0.5975	0.3825	4	1.185	1.465	0.93	4	15.8	16.8	14.8	13	50.4	57.7	43.6	13	16	17.7	15.1	13	4.29	4.93	3.08	13	2.59	6.12	1.57	13	5	6	4	13
3	173	239	120	21	8.94	10.27	6.085	15	2.83	3.66	2.23	17	3.635	8.885	2.8375	4	0.325	0.7625	0.06	4	1.435	2.265	1.0375	4	15.75	16.35	14.775	20	48.9	63.275	41.625	20	18	20.25	16.575	20	4.085	4.7075	3.1475	20	1.97	4.355	1.305	20	4	5	4	20
4	159	224	105	19	9.88	11.745	6.6675	14	3.05	3.46	2.15	19	1.37	2.5025	1.2125	6	0.675	0.8725	0.4025	6	1.655	2.015	1.28	6	15.4	16.55	15.025	18	52.65	59.925	45.075	18	15.7	19.4	14.975	18	3.81	4.1525	3.665	18	1.57	3.2	1.335	19	4	5	4	17
5	128.5	236.25	77.75	16	9.92	11.36	7.62	9	2.82	3.75	2.37	13	2.91	5.68	2.52	5	0.29	0.34	0.06	5	1.33	1.51	0.89	5	15.6	16.1	14.65	15	51.6	69.95	40.6	15	15.4	18.45	14.65	15	3.72	4.25	3.335	15	2.51	2.92	1.45	13	4	4	4	13
6	122	245.5	100.5	18	10.36	11.11	7.79	13	2.85	3.355	2.57	15	4.605	6.04	3.2	6	0.31	0.36	0.06	5	1.18	1.42	0.85	5	14.95	15.775	14.475	20	49.15	62.875	43.55	20	16.65	20.625	15.25	20	3.945	4.33	3.465	20	1.85	2.23	1.21	17	4	4	4	17
7	173	267.25	109.5	22	6.705	10.64	5.59	12	3.06	4.5175	2.6625	16	1.745	3.31	1.5075	6	0.96	0.98	0.87	5	1.51	3.15	1.19	5	15.15	16.1	13.925	18	46	55.425	40.95	18	15.85	20.025	14.725	18	3.92	4.355	3.1775	18	1.77	2.165	1.51	19	4	4.75	4	18
8	207.5	277.5	134	22	6.275	10.39	5.8725	16	3.22	4.235	2.8325	20	1.34	1.865	0.98	11	0.625	0.73	0.5275	8	1.715	2.555	1.2225	8	15	16.3	14.3	21	48.3	52.4	42.5	21	16.1	18	14.8	21	4.07	4.3	3.37	21	1.94	2.16	1.43	21	4	4	4	21
9	200	301.75	156	18	7.285	10.165	6.155	12	2.86	3.4	2.56	15	1.13	1.8875	0.815	6	0.54	0.6825	0.4725	6	1.56	2.025	1.26	6	16.1	16.2	14.7	15	49.5	54.05	43.9	15	16	17.95	14.7	15	3.66	4.325	2.87	15	1.97	2.405	1.265	15	4	4.5	4	15
10	172	285	125	21	9.19	9.78	7.34	11	3.135	4.3175	2.4725	12	1.82	2.0225	1.7025	4	0.53	0.68	0.5	3	1.14	2.465	0.98	3	15.2	16.6	14.4	17	47.5	51.7	37.1	17	16.1	17.1	14.7	17	4.06	4.86	3.17	17	1.57	2.21	1.19	17	4	4	4	17
11	218	286	160	20	8.09	11.56	6.93	17	2.83	3.5675	2.3975	20	0.98	1.56	0.66	7	0.67	0.8025	0.53	6	1.885	2.22	1.355	6	15.3	16.65	14.275	14	42.35	48.7	40	14	15.55	16.425	14.45	14	3.83	4.7225	2.96	14	2.02	3.02	1.4125	14	4	4.75	4	14
12	171	240	135	23	10.56	11.565	6.075	19	3.035	3.52	2.535	22	1.39	1.555	1.205	7	0.755	0.8	0.5825	6	1.855	1.9475	1.485	6	15.25	16.05	14.575	16	46.7	48.125	40.575	16	16	16.7	15.1	16	3.205	4.6	2.7575	16	2.42	2.5675	1.5	16	4	4	4	16
13	218	231.5	154.5	23	7.875	12.845	5.57	20	3.6	4.43	2.5325	20	1.35	1.99	0.9175	10	0.77	0.85	0.4925	8	1.57	2.2075	1.3175	8	14.6	15.5	13.9	17	44.1	46.9	40.8	17	15.2	15.8	14.5	17	4.13	5.35	3.38	17	2.04	2.82	1.65	17	4	4	4	17
14	192	249.5	151.5	23	10.47	12.89	6.42	15	2.99	3.55	2.2	17	1.34	1.53	0.8	9	0.685	0.7625	0.41	8	2.055	2.625	1.36	8	15.05	15.75	14.2	20	43.45	47.075	39.975	20	15.2	16.125	14.275	20	4.09	4.9275	3.095	20	2.44	3.62	1.6775	20	4	5	4	20
15	158	220	132	17	9.7	10.74	8.72	13	3.24	3.8375	2.25	16	1.1	1.77	0.88	9	0.43	0.71	0.41	9	1.79	2.36	0.96	9	15.15	15.925	14.4	12	46.25	50.175	43.05	12	15.05	16.95	14.1	12	4.345	5.0125	2.89	12	2.565	2.7675	2.1875	12	4	4	4	12
16	180	256.5	139.25	22	7.19	10.99	5.45	17	3.34	4.09	2.56	21	0.89	2.34	0.66	7	0.6	0.695	0.5325	4	1.815	2.5875	1.13	4	14.7	15.7	14	21	45.5	49.3	40.7	21	15.8	17.7	14.9	21	4.08	5.03	2.69	21	2.15	3.01	1.5	21	4	4.25	4	20
17	203	310.5	160	19	8.155	11.1975	6.12	12	3.93	4.39	2.93	17	1.38	1.9475	1.21	4	0.61	0.855	0.475	4	2.67	2.8725	2.145	4	15.1	15.65	14.5	15	43.7	47.35	42.4	15	15.8	16.4	15.15	15	3.6	4.795	2.92	15	2.71	3.435	1.89	15	4	5	4	15
18	202	250	131	21	8.125	10.615	6.1575	12	3.48	4.0125	2.8625	18	1.23	2.065	0.88	8	0.555	0.6875	0.4975	6	2.36	2.535	1.57	6	15	15.675	14.35	18	42.25	46.2	38.625	18	15.25	16.125	14.7	18	3.935	4.6475	3.175	18	3.055	5.7725	1.605	18	5	5	4	18
19	172	275.5	103.5	19	7.465	8.3675	6.3475	14	3.46	4.29	2.9975	18	1.85	2.545	1.58	11	0.63	0.855	0.485	11	2.44	2.835	1.67	11	14.7	16.1	14.025	18	42.55	47.375	37.3	18	15.4	16.5	14.825	18	3.745	4.7	3.0675	18	2.985	5.8725	1.755	18	5	5	4	18
20	199	313	136	19	6.46	8.545	5.405	15	3.625	4.3725	2.75	18	2.04	2.25	1.48	7	0.615	1.0025	0.4375	6	2.14	2.5325	1.635	6	15	15.725	14	16	44.25	49.525	37.2	16	15.7	16.375	15.125	16	3.645	4.27	2.36	16	2.585	5.1525	2.0025	16	4.5	5	4	16
21	199.5	253	140.75	20	7.02	10.14	5.8	17	3.575	4.535	2.975	20	1.39	2.245	0.98	8	0.72	1.18	0.65	5	1.98	2.1	1.92	5	14.95	15.8	14.625	16	41.9	47.3	38.075	16	15.55	16.95	14.575	16	3.655	4.9525	3.0175	16	2.14	3.61	1.27	17	4	5	4	16
22	192	227.25	151	22	7.62	9.71	6.4125	16	3.425	4.05	2.7375	22	1.305	2.1725	1.155	10	0.55	0.69	0.5	9	2.52	2.52	2.23	9	15	15.275	14.425	16	40.9	45.3	37.425	16	15.6	16.4	15.025	16	3.775	4.33	3.4675	16	2.185	5.5075	1.125	16	4.5	5	3.75	16
23	185	279.5	158.5	19	7.46	9.2125	6.015	10	3.305	3.92	2.785	18	1.71	2.075	1.055	7	0.56	0.605	0.51	7	2.12	2.45	2.09	7	14.9	15.4	14.15	15	39.8	46.35	38.25	15	15.8	16.5	15.15	15	4.21	5.5	3.625	15	2.575	4.155	1.51	16	4	5	4	15
24	182	269	152	21	8.445	10.03	6.4475	16	3.63	4.48	2.73	21	1.5	2.12	1.14	13	0.52	0.6	0.445	11	1.79	2.445	1.7	11	14.8	16	13.6	17	41.2	44.7	32.8	17	15.4	15.8	14.8	17	4.16	5.4	2.96	17	3.515	6.2925	1.785	18	5	5	4	17
25	156	238	116	15	7.09	11.785	5.845	10	3.43	4.005	2.665	15	1.37	1.48	1.19	5	0.59	0.68	0.575	3	2.16	2.85	1.905	3	15.25	15.95	14.375	12	42.2	43.1	38.4	12	15.3	16.25	14.875	12	4.15	4.565	2.93	12	4.99	5.87	1.36	13	5	5	4.75	12
26	215.5	270.75	173.25	18	8.73	10.7675	6.83	16	3.71	4.155	3.105	19	2.16	2.5675	1.8175	4	0.88	1.11	0.81	4	2.97	3.6325	2.115	4	14.5	15.1	13.6	17	37.1	40.8	33.7	17	16.2	16.8	15	17	4.34	5.34	3.67	17	2.58	6.2	1.29	17	4	5	4	17
27	209.5	318.5	144.5	14	9.6	9.965	7.3825	10	3.725	4.8425	2.9775	12	2.21	2.84	1.88	3	0.67	0.78	0.665	3	2.93	3.085	2.825	3	15	15.275	13.85	10	40.95	42.65	36.5	10	15.35	15.9	14.6	10	4.09	5.4725	3.72	10	2.16	5.7975	1.185	10	4	5	4	10
28	186	236	145	17	8.61	11.46	6.79	13	3.325	4.2225	2.68	16	1.375	1.7825	0.93	10	0.78	1.2925	0.6925	10	1.89	2.5375	1.7325	10	15.2	15.925	14.55	16	37.9	42.425	34.9	16	16.3	17.975	15.425	16	3.65	4.315	2.85	16	2.525	5.2575	1.8375	16	4	5	4	16
29	176	257	145.5	15	8.185	12.5475	7.525	10	2.985	4.09	2.555	14	1.16	1.32	0.76	5	0.65	0.83	0.545	4	2.215	3.2175	1.39	4	15.6	16.3	14.4	13	37.2	45.1	32	13	16.5	16.8	15.6	13	3.63	4.14	2.34	13	2.26	2.9	1.52	13	4	5	4	13
30	187	268	149	17	6.8	7.64	6.49	12	3.465	4.0725	2.865	16	0.94	1.38	0.625	3									15	15.625	14.175	14	39.2	43.05	35.525	14	16.5	17.225	16.15	14	4.3	4.605	3.7225	14	2.715	3.73	1.4875	14	4	5	4	14
31	179	281.5	126.5	12	9.58	11.91	6.06	9	3.23	4.4075	2.7875	12	1.89	2.685	1.585	3									15.4	16.4	14.6	11	38.6	44.8	36.2	11	16.8	17.75	15.5	11	4.42	4.86	3.94	11	2.51	5.395	1.935	11	4	5	4	11
32	168.5	323.5	111	16	7.605	9.4	6.3525	14	3.275	3.885	2.7525	16	1.31	1.35	1.28	5	0.795	1.0525	0.63	4	3.1	4.1225	2.2725	4	15.75	16.9	15.025	14	39.5	44.4	33.6	14	16.2	16.625	15.675	14	4.575	5.135	3.9575	14	3.255	12.6125	1.8225	14	4.5	5	4	14
33	199	337.5	84.75	12	8.88	11.595	7.7925	10	3.69	4.945	2.525	11													15.7	16.95	14.25	11	45.1	46.05	36.15	11	15.6	17	14.8	11	4.33	4.845	4.075	11	5.12	11.835	2.595	11	5	5.5	4.5	11
34	206.5	305.25	144.5	14	7.1	10.65	6.89	13	3.79	4.685	2.78	15	1.45	2.045	0.87	7	0.575	0.6475	0.4275	6	1.78	2.4075	1.25	6	15.4	16.9	13.9	13	45.2	46.9	36.9	13	16.6	16.8	14.9	13	5.08	6.07	4.67	13	3.23	8.41	1.93	13	5	5	4	13
35	205	244	180	9	10.825	12.3	7.9425	8	3.03	4.18	2.5475	8	1.24	1.49	1.04	5	1.005	1.55	0.525	4	2.885	4.415	1.38	4	16.45	17.3	14.9	8	44.5	47.65	42.3	8	16.35	17.2	16.05	8	5.195	5.71	4.615	8	4.48	7.955	2.835	8	5	5	4.75	8
36	140	264.25	97.75	8	7.52	11.1	6.235	7	4.61	6.705	3.45	8	1.97	2.06	1.16	5	1.135	1.6475	0.625	4	3.96	5.3525	2.35	4	15.45	16.85	13.625	8	39.15	45.075	35.775	8	16	16.35	15.625	8	4.02	5.045	3.125	8	7.98	21	2.35	8	5	5.25	4	8
37	276	322.5	181.5	6	5.84	9.91	5.6325	6	4.01	5.48	3.62	6													14.5	15.9	14	5	43.3	44.6	36.4	5	16.8	17.6	16.5	5	4.96	5.32	3.44	5	2.47	6.71	1.24	5	4	5	4	5
38	168	216.5	141.5	7	6.635	7.34	5.8925	6	3.125	3.4025	2.6825	6													15.05	15.95	14.45	6	35.2	35.2	32.2	5	15.6	16.3	14.4	5	2.91	4.29	2.83	5	9.69	18.77	5.935	6	5	5	5	5
39	241.5	299.75	198	8	7.43	8.19	6.945	7	3.84	5.56	3.09	7	1.955	2.0475	1.5625	4	0.86	1.335	0.725	3	2.77	4.18	2.4	3	14.25	14.675	13.825	6	42.35	44.375	35.45	6	15.75	15.9	14.925	6	4.45	6.98	3.78	6	2.03	7.865	1.07	6	4	4.75	2.5	6
40	218	292.5	148	3
41	237	374	230	5	8.22	9.15	7.34	5	4.79	4.98	3.99	5	1.65	1.915	1.605	3	0.8	1.24	0.77	3	2.57	3.595	2.56	3	14.95	16.2	14.45	4	43.25	50.55	41.85	4	16.05	18.825	15.725	4	5.81	6.5475	4.53	4	2.5	4.1125	1.9725	4	4	4.25	4	4
42	216	356.75	96.25	6	5.92	9.02	5.4925	4	4.185	5.5375	3.1675	4	1.78	2.815	1.51	3	0.81	0.895	0.755	3	3.47	4.255	2.83	3	14.5	15.425	13.725	4	37.8	43.375	32.625	4	17.1	17.45	16.2	4	6.145	7.4425	4.5625	4	9.465	15.52	3.98	4	5	5	4.75	4
43	261.5	346.25	210.75	4	7.085	7.8575	6.3825	4	4.74	5.775	3.8125	4	2.055	2.76	1.55	4	0.86	1.1	0.74	4	2.845	3.425	2.5575	4	14.65	14.975	14.2	4	41.85	43.175	37.175	4	17.45	18.8	16.775	4	4.995	6.3825	3.8325	4	1.48	2.695	1.44	3	4	4.5	4	3
44	246	295	112.25	6	7.625	9.2975	5.8225	4	3.74	4.18	3.68	5	1.54	3.395	1.37	3	0.72	0.765	0.68	3	2.51	3.21	2.075	3	15.25	15.925	14.7	4	42.8	43.725	41.725	4	15.6	18.25	14.925	4	4.155	4.6625	3.6725	4	11.155	21	1.2275	4	5	6	3.5	4
45	290.5	355.5	225.75	4	7.02	9.755	6.185	3	4.54	5.035	3.96	3	3.47	3.785	2.44	3	0.78	0.8	0.765	3	2.74	3.315	2.515	3	13.8	14.55	13.35	3	33.7	38	31.65	3	17.8	18.45	15.8	3	4.11	4.26	4.04	3	1.53	10.97	1.1	3	4	4.5	3	3

## Sheet: critical.non
Day.after.admission	PLT(x10^9/L)				GLU(mmol/L)				TC(mmol/L)				TG(mmol/L)				HDL(mmol/L)				LDL(mmol/L)				PT(s)				APTT(s)				TT(s)				FIB(g/L)				D.dimer(g/L)				DIC
	Median	Q3	Q1	no.	Median	Q3	Q1	no.	Median	Q3	Q1	no.	Median	Q3	Q1	no.	Median	Q3	Q1	no.	Median	Q3	Q1	no.	Median	Q3	Q1	no.	Median	Q3	Q1	no.	Median	Q3	Q1	no.	Median	Q3	Q1	no.	Median	Q3	Q1	no.	Median	Q3	Q1	no.
1	62	143	23.25	40	12.575	17.9325	9.7175	34	2.205	3.175	1.6925	38	1.41	2.44	0.9	13	0.5	0.69	0.19	13	1.02	1.84	0.65	13	19	22.45	17.4	31	45.8	63.55	39.7	31	16.1	19.65	14.85	31	4.04	5.16	2.575	31	8.8	21	2.89	30	6	7	5	30
2	67.5	139.5	35.5	34	11.045	14.2925	8.0275	32	2.555	3.3875	1.9725	34	1.73	3.135	1	15	0.5	0.7	0.32	15	1.54	2	0.945	15	18.4	22.05	15.9	31	49.5	63.65	42.4	31	16.7	20.85	15.25	31	4.34	5.49	2.64	31	5.7	20.6475	2.905	30	6	6	5	30
3	72	148.5	48.5	31	9.48	13.3	7.1175	26	2.68	3.57	2.22	29	2.075	2.47	1.1625	16	0.6	0.685	0.4725	16	1.715	2.135	1.1525	16	17.2	20.4	16	27	46.2	57.75	41.2	27	17.4	20.7	15.6	27	3.7	5.78	2.115	27	5.04	21	2.815	27	6	6.5	5	27
4	82	144	35	29	8.17	10.55	7.11	26	2.865	3.575	2.215	28	2.07	2.465	1.01	14	0.515	0.6275	0.375	14	1.265	2.105	1.0825	14	17.3	19.75	15.7	23	50.7	53.75	41.375	22	15.6	20.325	15.025	22	4.015	5.775	2.3175	22	7.31	21	3.29	23	6	6.75	5	22
5	88	166	40.5	23	10.42	12.02	8.075	19	3.11	3.67	2.18	21	1.61	1.765	1.1775	10	0.4	0.575	0.375	10	1.405	2.015	0.8675	10	16.2	18.9	14.9	17	45.3	55.3	41	17	16	16.9	14.5	17	4.89	5.42	3.38	17	2.82	4.16	2.32	17	5	6	4	17
6	82	144.5	58.5	23	9.085	13.0075	6.5675	20	2.74	3.83	2.4	21	1.14	2.505	0.965	11	0.6	0.89	0.46	11	1.69	2.505	1.495	11	15.75	17.525	14.9	16	46.75	51.975	39.725	16	15.55	16.125	15.3	16	4.695	5.72	3.5275	16	3.725	8.5525	2.425	16	5	6	4.75	16
7	97.5	137.5	38	24	9.64	12.01	6.47	25	2.975	3.985	2.465	26	1.915	2.355	1.7875	8	0.4	0.4775	0.3775	8	1.365	1.88	1.035	8	15.9	18.425	15.075	16	42.7	50.15	40.275	16	16.65	17.65	14.9	16	4.725	6.0925	3.31	16	3.465	4.6925	2.42	16	5	6	4	16
8	107	133	60.25	16	10.76	14.875	7.9125	14	3.27	3.46	2.615	15	1.81	2.195	1.1975	8	0.505	0.7625	0.3975	8	2.17	2.4825	1.78	8	17.6	19.35	15.625	14	49.9	58.025	45.675	14	16.15	18.4	14.875	14	4.73	6.085	3.3825	14	4.105	13.5175	2.5775	14	5	6	4.25	14
9	103	154	41	17	9.815	12.255	8.05	14	3.14	3.8525	2.4425	16	1.73	1.9	1.515	6	0.58	0.835	0.43	6	2.005	2.15	1.5825	6	17.15	21.425	15.75	16	45.65	57.65	39.325	16	16.65	18.825	14.925	16	5.04	6.0675	3.445	16	9.42	19.4325	2.9575	16	5	6	5	16
10	113	157.75	53.5	14	10.915	12.62	7.8125	12	3.01	3.1925	2.4325	14	1.53	1.85	1.47	5	0.87	1.11	0.71	5	1.61	1.82	1.61	5	16.5	17.65	15.525	14	44.5	50.975	38.9	14	16.45	17.425	15.625	14	4.99	6.3175	4.025	14	13.18	21	2.5225	14	5	6	5	14
11	126	152.5	65.5	7	7.2	9.915	6.905	7	2.91	3.4	2.43	9	2.02	2.21	1.2	5	0.66	0.8	0.52	5	1.73	3.36	1.72	5	17.8	19.85	16.8	7	42.2	60.45	39.75	7	21.6	29.2	16.75	7	4.82	5.18	2.65	7	21	21	11.895	7	5	6	5	7
12	155	179.25	107.75	8	6.53	7.545	6.065	7	3.055	3.3625	2.91	8	1.155	1.61	0.905	4	0.77	0.8525	0.6775	4	2.335	3.28	1.86	4	16.7	17.975	15.275	8	47.2	54.35	35.1	7	20.5	23.35	16.05	7	4.76	6.065	3.59	7	13.22	21	2.7125	8	5	5	4.5	7
13	131.5	228.25	93.75	10	7.43	9.67	7.29	5	3.3	3.57	2.94	9	1.24	1.4575	1.0175	4	0.72	0.78	0.6575	4	1.755	2.07	1.4025	4	15.55	16.825	14.875	6	43.05	45.475	42.05	6	16.15	19.8	14.975	6	5.22	5.8675	3.9125	6	2.6	3.53	1.6	5	5	5	4	5
14	214	274	154	5	10.16	10.42	6.82	5	3.24	4.48	2.595	7	1.445	1.7225	1.1775	4	0.75	0.8825	0.6375	4	2.175	2.895	1.6	4	16.9	18.7	15.1	5	36.3	38.8	36.2	5	19.1	19.7	17.4	5	5.15	6.33	3.07	5	2.62	13.98	1.74	5	5	5	4	5
15	146	186.75	124	6	9.9	10.57	6.92	5	3.16	4.8475	2.635	6													17.1	17.1	16.5	6	42.45	50.1	38.25	6	18	19.15	16.175	6	3.445	4.35	2.825	6	9.27	19.825	2.1875	6	5	5	4.25	6
16	192	224.75	147.75	8	9.24	12.51	8.19	5	3.45	3.76	3.2375	6	2.02	2.32	1.615	3	0.6	0.885	0.59	3	2.57	3.33	2.23	3	15.4	15.8	15	7	38.7	45.75	36.05	7	17.5	25.45	16.5	7	5.19	5.705	3.825	7	2.75	12.44	2.485	7	5	5	4	7
17	171.5	225.75	110.5	6	7.325	8.6075	5.735	4	3.195	3.7325	2.4775	6	1.93	2.045	1.635	3	0.66	0.95	0.605	3	2.59	2.86	2.255	3	16.5	16.725	14.775	6	45.5	66.8	38.525	6	19.4	61.9	18.15	6	3.275	3.5325	3.0325	6	4.475	10.52	3.2225	6	5	5	5	6
18	278.5	305.25	225	4	8.39	8.775	8.02	3	2.96	3.12	2.74	4													16.15	17.15	15.05	4	38.7	40.725	36.55	4	17.6	18.2	16.725	4	4.6	5.9875	3.5175	4	2.895	3.9875	2.8425	4	4	4.25	4	4
19	249.5	286.25	183.5	6	8.08	9.63	8.055	3	2.78	3.205	2.555	4
20	243	289.75	203.5	4	7.035	7.5075	6.6575	4	3.17	3.5875	2.92	4													14.55	15.05	14.1	4	35.85	41.65	31.625	4	15.9	17.325	15.025	4	4.165	4.7575	3.745	4	4.27	4.31	2.625	3	5	5	4	3
21	273	292.5	225.5	3					2.91	2.975	2.895	3

## Sheet: P.value(survivor.vs.non-surviv)
Day.before.outcome	PLT	GLU	TC	TG	HDL	LDL	PT	APTT	TT	FIB	D.dimer	DIC
1	2.93011e-06	7.89721e-06	4.86223e-05	0.608537	0.0571835	0.100629	8.63393e-07	0.468302	0.17375	0.334931	1.54814e-05	4.19927e-07
2	0.0142286	0.53653	0.97048	0.9613	0.920275	0.46904	0.00565334	0.79699	0.268559	0.958966	0.034377	0.0139944
3	0.00106326	0.149146	0.538885	0.072386	0.44918	0.963467	0.00587068	0.423405	0.497829	0.991416	0.00241638	0.000227527
4	0.00538326	0.435468	0.862316	0.779051	0.432266	0.71806	0.0134725	0.28891	0.624314	0.849057	8.92334e-05	0.0003572
5	0.109804	0.561874	0.817792	0.012654	0.197647	0.951127	0.179698	0.39547	0.864953	0.121523	0.258371	0.0480456
6	0.0658674	0.898885	0.630229	0.0103426	0.023262	0.0412817	0.0798355	0.275833	0.251454	0.115009	0.00143027	0.00301606
7	0.00309442	0.0950978	0.484301	0.851815	0.091845	0.4636	0.104718	0.300586	0.80905	0.0503526	0.0102742	0.048766
8	0.00114222	0.00337819	0.689095	0.657405	0.528005	0.505361	0.00948172	0.266396	0.761742	0.345711	7.59017e-05	0.000628285
9	0.000217666	0.0604252	0.423188	0.393939	0.809855	0.335822	0.0113458	0.751805	0.593371	0.0597228	0.000157598	0.000574275
10	0.0160386	0.287547	0.487304	0.730159	0.142857	0.548595	0.0427608	0.920935	0.633565	0.177056	0.00202043	0.00247494
11	0.00265081	0.664003	1	0.267677	1	0.792208	0.00510384	0.88135	0.0206541	0.743326	0.0180078
12	0.168496	0.151572	0.622339	0.527273	0.761905	0.239526	0.149508	1	0.037999	0.277618	0.00630281	0.0192772
13	0.164299	0.865109	0.333795	0.733267	1	0.808081	0.141187	1	0.293144	0.431117	0.648591
14	0.816239	0.44453	0.576116				0.184827	0.129418	0.0190416	0.487596	0.530435
15	0.575214	0.633053	0.356647	0.581818	0.554789	0.727273	0.0825159	0.511857	0.0829929	0.750269	0.373103
16	0.908591	0.163591	0.792947	0.516667	0.721277	0.4	0.312829	0.395682	0.105428	0.17167	0.123846
17	0.302541	0.598901	0.391691				0.258043	0.907008	0.00345429	0.785121	0.0548061	0.0307188
18	0.368696	1	0.262201				0.306741	0.226931	0.0968302	0.434176	0.711962
19	0.355839	0.197059	0.327471
20	0.66742	0.885449	0.765685				0.636094	0.211352	0.962261	0.276831	0.957688
21	0.457369		0.166008
